# Supplementary material
Source: PubMed Central journal article supplement (PMC3946880)

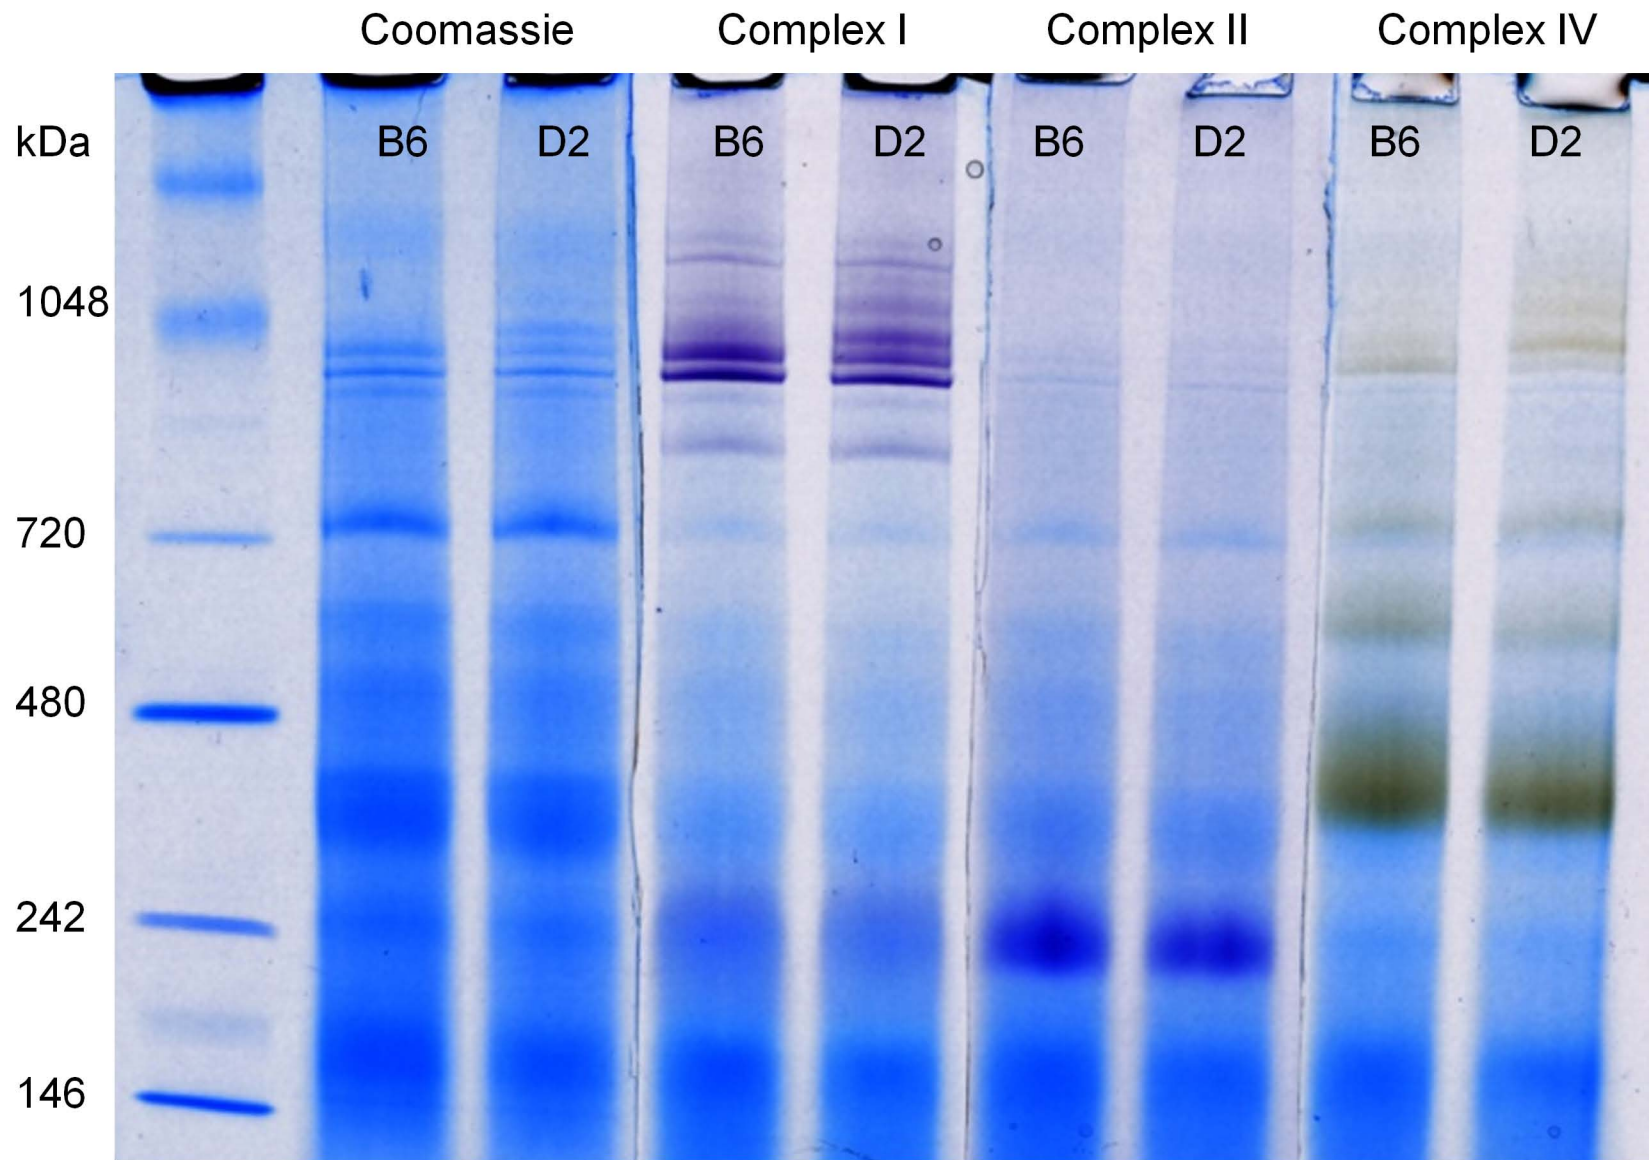

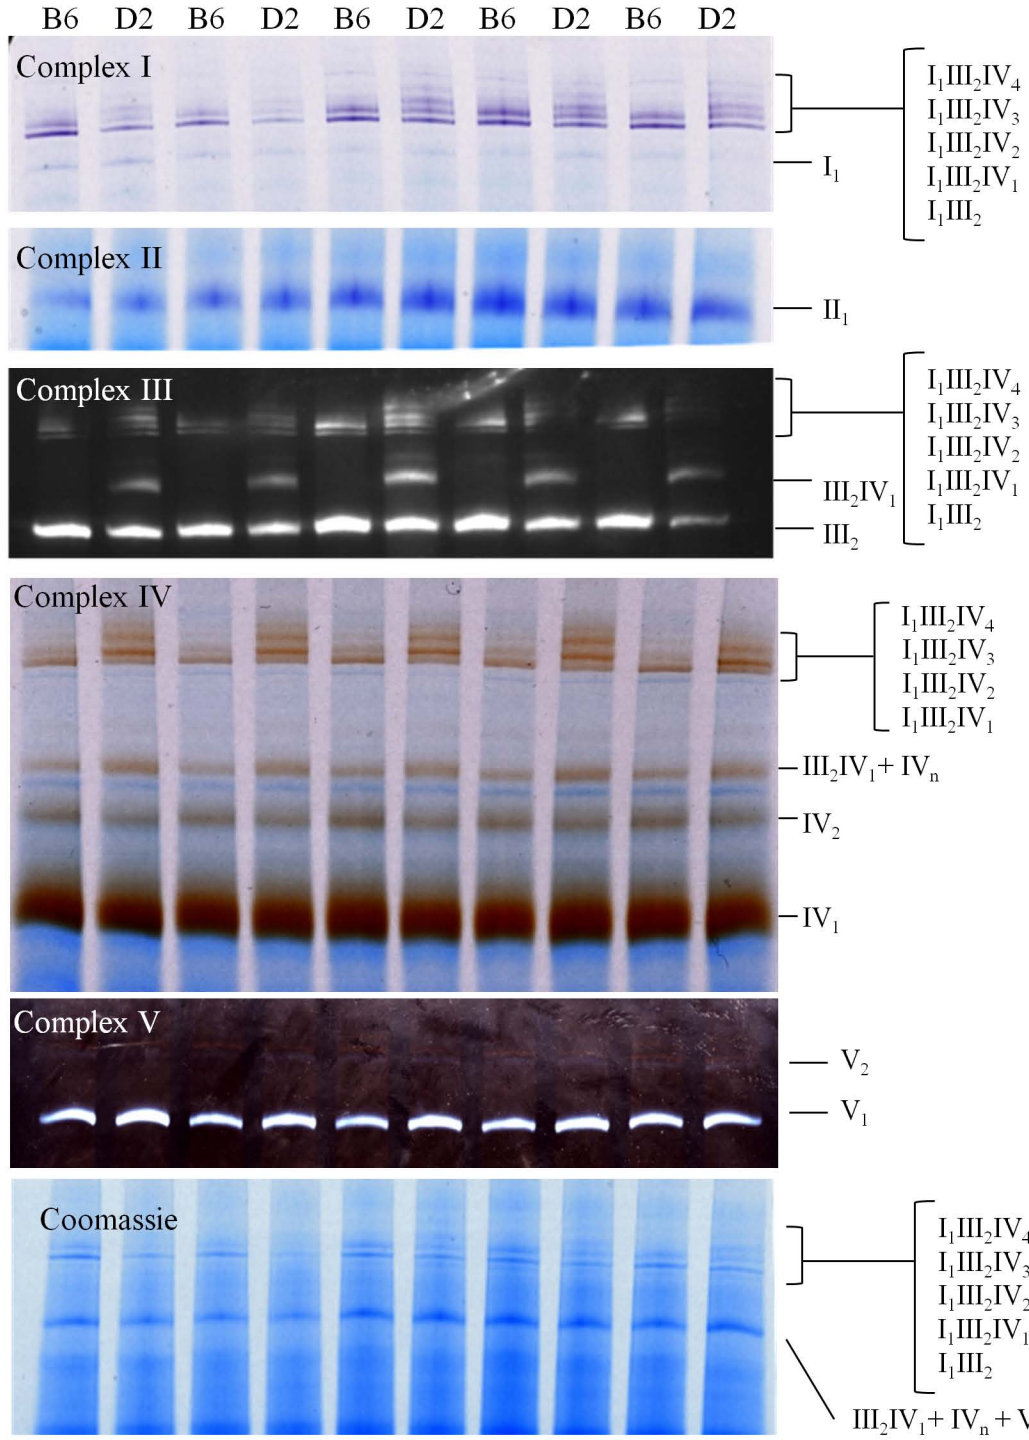

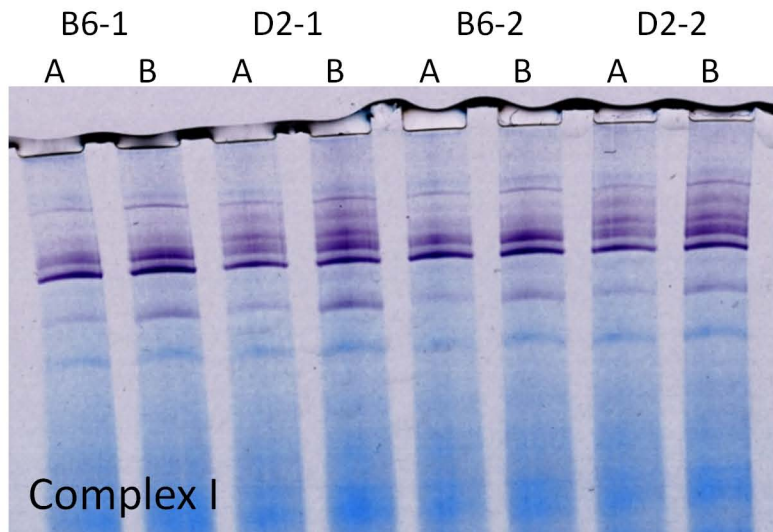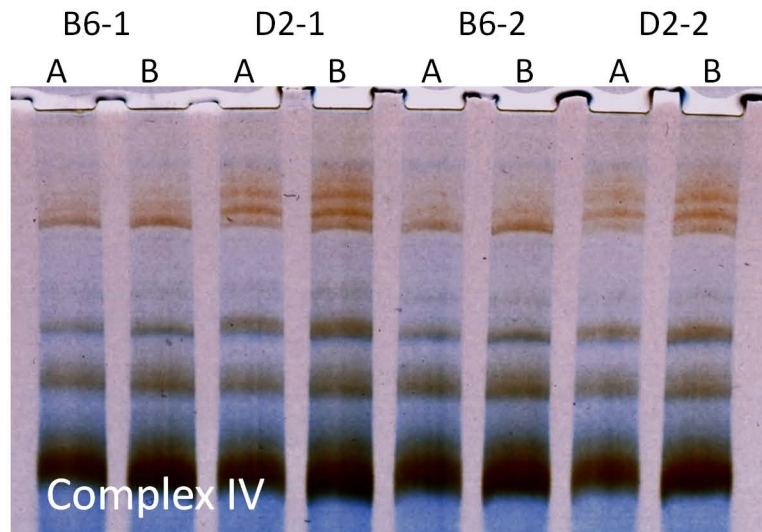

Supplement: NIHMS540705-supplement-Supp_Fig_S1-S3.pdf [file NIHMS540705-supplement-Supp_Fig_S1-S3.pdf]
